# Supplementary material for: Understanding the Changing Attitudes and Behaviours of Individuals in Cities During COVID 19 Pandemic Through Qualitative Research
Source: Preprints.org preprint supplement (doi:10.20944/preprints202306.0048.v1), 2023-06-01
Supplement: Supplementary file 1 [file supplementary]

# Author Information file:

**the title of the article:** Understanding the changing attitudes and behaviours of individuals in cities during Covid 19 pandemic through qualitative research

**the author(s)' names and affiliations**: Indrajeet Sunil Ghule, Alumni, Politecnico di Milano, Italy.

**full contact details (including email, postal address and phone and fax numbers) for the corresponding author:**

Chandrama,

Near Railway Crossing,

Manjari Budruk,

Tal-Haveli, Dist- Pune- 412307.

Maharashtra, India.

Contact:- +919404683566

Email: [indrajeet.ghule@mail.polimi.it](mailto:indrajeet.ghule@mail.polimi.it)

<https://orcid.org/0000-0002-8160-8311>

Indrajeet Sunil Ghule is a graduate of Politecnico di Milano, Italy. He completed Laurea Magistrale M.Sc in Architecture and Urban Design with 110/110 cum laude in December 2022. Indrajeet received merit-based scholarship from the Ministry of foreign affairs and International Cooperation, Italy in 2021. His research thesis is ‘*The Unanswered Paradigm: The Study of Voids in Pune.’*  The research focuses on understanding the value of the urban voids in the city and how they contribute back to the city. He also worked as a research intern at Politecnico di Milano, under the guidance of Prof. Gaia Caramellino for the research on Middle-class Mass Housing in Europe. (www.mcmh.eu)

Indrajeet completed his Bachelor of Architecture at S.P.Pune University as a gold medalist. After his studies, he worked at VastuShilpa Consultants: Sangath, studio of Pritzker Laureate Balakrishna Doshi and Ar. Rajeev Kathpalia. He was working on university campus projects such as Flame University as well as Nalanda University.
